# Supplementary material for: Cardiac Glycosides Induce Cell Death in Human Cells by Inhibiting General Protein Synthesis
Source: PubMed Central journal article supplement (PMC2788214; doi:10.1371/journal.pone.0008292), 2009-12-16
Supplement: pone.0008292.s007.pdf [file pone.0008292.s007.pdf]

Ouabain (instance ids 1302, 5026, 6680) vs C-map

| Rank | Compound         | n | Enrichment score | Description |
|------|------------------|---|------------------|-------------|
| 1    | proscillaridin   | 3 | 0.997            | CG          |
| 2    | lanatoside C     | 6 | 0.997            | CG          |
| 3    | digoxin          | 4 | 0.995            | CG          |
| 4    | helveticoside    | 6 | 0.995            | CG          |
| 5    | ouabain          | 4 | 0.995            | CG          |
| 6    | digitoxigenin    | 4 | 0.995            | CG          |
| 7    | digoxigenin      | 5 | 0.995            | CG          |
| 8    | anisomycin       | 4 | 0.990            | PSI         |
| 9    | phenoxybenzamine | 4 | 0.974            | other       |
| 10   | cycloheximide    | 4 | 0.968            | PSI         |

Digoxin (instance ids 2423, 3283, 5324) vs C-map

| Rank | Compound         | n | Enrichment score | Description |
|------|------------------|---|------------------|-------------|
| 1    | proscillaridin   | 3 | 0.996            | CG          |
| 2    | ouabain          | 4 | 0.996            | CG          |
| 3    | digoxin          | 4 | 0.996            | CG          |
| 4    | lanatoside C     | 6 | 0.996            | CG          |
| 5    | digoxigenin      | 5 | 0.995            | CG          |
| 6    | helveticoside    | 6 | 0.995            | CG          |
| 7    | digitoxigenin    | 4 | 0.995            | CG          |
| 8    | anisomycin       | 4 | 0.976            | PSI         |
| 9    | cycloheximide    | 4 | 0.969            | PSI         |
| 10   | phenoxybenzamine | 4 | 0.964            | AH          |

Proscillaridin (instance ids 4404, 2920, 7340) vs C-map

| Rank | Compound       | n | Enrichment score | Description |
|------|----------------|---|------------------|-------------|
| 1    | proscillaridin | 3 | 1.000            | CG          |
| 2    | ouabain        | 4 | 0.996            | CG          |
| 3    | digoxin        | 4 | 0.996            | CG          |
| 4    | lanatoside C   | 6 | 0.996            | CG          |
| 5    | digoxigenin    | 5 | 0.995            | CG          |
| 6    | helveticoside  | 6 | 0.995            | CG          |
| 7    | digitoxigenin  | 4 | 0.995            | CG          |
| 8    | anisomycin     | 4 | 0.986            | PSI         |
| 9    | cycloheximide  | 4 | 0.969            | PSI         |
| 10   | thioguanosine  | 4 | 0.968            | other       |
